# Supplementary material for: Burden, trends, and predictions of liver cancer in China, Japan, and South Korea: analysis based on the Global Burden of Disease Study 2021
Source: Springer Nature journal article supplement (doi:10.1007/s12072-024-10763-6), 2025-01-11

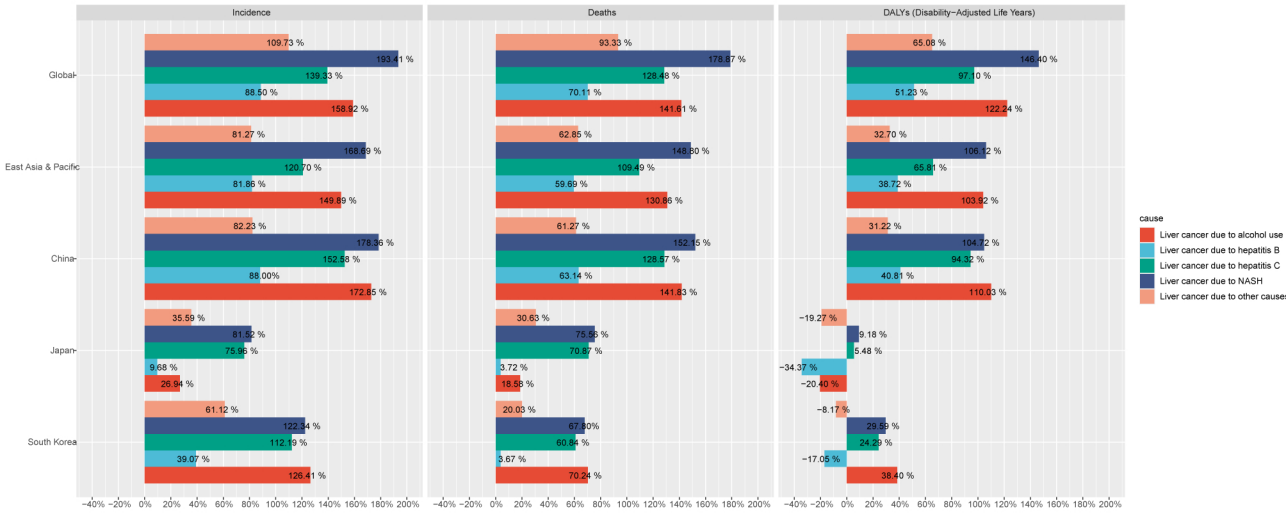

Supplement: MOESM1 [file 12072_2024_10763_MOESM1_ESM.pdf]
